# Fixational eye movements as active sensation for high visual acuity

Trang-Anh E. Nghiem<sup>a,b,1</sup>, Oscar Dufour<sup>a,b</sup>, Jenny L. Reiniger<sup>c</sup>, Wolf M. Harmening<sup>c</sup>, and Rava Azeredo da Silveira<sup>a,b,1</sup>

<sup>a</sup>Laboratoire de Physique de l'Ecole Normale Supérieure, ENS, Université PSL, CNRS, Sorbonne Université, Université de Paris, 75005 Paris; <sup>b</sup>Institute of Molecular and Clinical Ophthalmology Basel, Basel; <sup>c</sup>Department of Ophthalmology, Rheinische Friedrich-Wilhelms-Universität Bonn

This manuscript was compiled on April 26, 2022

**Perception and action are inherently entangled: our world view is shaped by how we explore and navigate our environment through complex and variable self-motion. Even when fixating on a stable stimulus, our eyes undergo small, involuntary movements. Fixational eye movements (FEM) render a stable world jittery on our retinae, which contributes noise to neural coding. Yet, empirical evidence suggests that FEM help rather than harm human perception of fine detail. Here, we elucidate this paradox by uncovering under which conditions FEM improve or impair retinal coding and human acuity. We combine theory and experiment: model accuracy is directly compared to that of healthy human subjects in a visual acuity task. Acuity is modeled by applying an ideal Bayesian classifier to simulations of retinal spiking activity in the presence of FEM. In addition, empirical FEM are monitored using high-resolution eye-tracking by an adaptive optics scanning laser ophthalmoscope. While FEM introduce noise, they also effectively pre-process visual inputs to facilitate retinal information encoding. Based on an interplay of these mechanisms, our model predicts a relation between visual acuity, FEM amplitude, and single-trial stimulus size that quantitatively accounts for experimental observations and captures the beneficial effect of FEM. Moreover, we observe that human subjects' FEM statistics vary with stimulus size, and our model suggests that changing eye motion amplitude, as the subjects indeed do, enhances acuity as compared to maintaining eye motion size constant. Overall, our findings indicate that perception benefits from action even at the fine and noise-dominated spatio-temporal scale of FEM.**

Eye movements | Retina | Bayesian inference | Adaptive Optics

**H**uman perception is inherently active: as you read this sentence, your eyes produce incessant, intricate movements necessary for vision. Even when attempting to fixate a single letter without moving, spontaneous, small-amplitude eye jittering occurs, known as fixational eye movements (FEM). Yet, in spite of FEM, we perceive our visual environment as stable (1) and we are able to distinguish details finer than the amplitude of FEM (2). Our understanding of the role of FEM in shaping perception remains incomplete: on the one hand, FEM can impair visual acuity by introducing noise (2, 3); on the other hand, experiments show that FEM can enhance fine detail vision in human subjects (4, 5).

As evidence suggests that information about the trajectories traced out by the eyes during FEM is unused in downstream processing (3, 6–9), one expects FEM to blur out fine visual details and, thereby, hinder perception. Indeed, retinal spiking is stochastic by nature, and therefore keeping one's eyes static to overcome noisy spiking is advantageous compared to moving them. A static eye leads to more spikes encoding the same stimulus in the same position, which allows the noise to be averaged out over time. This effect, according to which FEM are harmful for coding, is illustrated in previous modeling

works in which a Bayesian decoder infers stimuli pixel-by-pixel from simulations of stimulus-evoked retinal spiking (2, 3). In this framework, small to no FEM allow for a decoder to average out noise, as compared to larger FEM, though it remains possible to decode stimuli in the presence of sufficiently small FEM.

In a contrasting picture, human psychophysics suggest that FEM support perception: experimentally suppressing FEM by stabilizing stimuli on a subject's retina impairs visual acuity (4), especially in distinguishing fine details (5). Here, FEM play a helpful role by pre-processing the visual input so as to effectively transform the spatio-temporal structure of receptive fields in retina (10–12) and thalamus (13, 14). In the temporal domain, FEM renders retinal responses to stimuli less transient in time: while retinal spiking decays over time upon presentation of a static stimulus, jittery eye motion refreshes each cell's receptive field, which elicits sustained retinal activity that encodes the visual input (10). In the spatial (frequency) domain, the statistics of FEM are such that the pre-processing filter they effectively apply can enhance retinal gain at high spatial frequencies: small-amplitude jitter in eye position causes fine spatial stimulus features to move through retinal receptive fields, which induces temporal changes in receptive field contents and hence stimulus-relevant variations in retinal activity (11, 12). Overall, FEM allow for temporal encoding of stimuli by rendering retinal activity sustained through time and able to encode fine spatial detail through

## Significance Statement

Perception is inherently active: we need to move our eyes to see the world around us. Yet our eyes also undergo tiny, unconscious movements that can blur out fine visual details. Paradoxically, previous work suggested that these small movements aid fine detail perception. Here, we investigate this paradox to uncover in which contexts small eye movements help or harm visual acuity. Comparing a model of retinal responses with recordings of human visual acuity, we elucidate the mechanisms by which and conditions in which small eye movements support fine detail discrimination. Our results also suggest that varying eye movement amplitude according to stimulus size enhances retinal coding, highlighting that perception is active even at the level of very fine eye movements.

All authors designed research. TAEN and RAdS designed the model and TAEN implemented it and ran simulations. JLR and WMH designed the experimental paradigm and conducted experiments. TAEN and OD analyzed experimental data. TAEN and RAdS wrote the manuscript and all authors edited it.

The authors declare no competing interests.

<sup>1</sup>To whom correspondence should be addressed. E-mail: [trang-anh.nghiem@cantab.net](mailto:trang-anh.nghiem@cantab.net), [rava@ens.fr](mailto:rava@ens.fr)

50 temporal variations in spiking.

51 Here, we combine theory and experiment to study the role of  
 52 FEM in shaping retinal coding and visual acuity. In particular,  
 53 we investigate the interplay of the opposite mechanisms of  
 54 averaging over noisy spikes, which renders FEM harmful, and  
 55 temporal coding, which makes FEM advantageous for visual  
 56 acuity. The two mechanisms are most relevant at different  
 57 stimulus sizes and FEM amplitudes; we therefore study their  
 58 interactions and the resulting nature of visual coding across  
 59 experimental conditions and model parameters.

60 From the interplay of different coding mechanisms, we  
 61 derive a relation between visual acuity, FEM amplitude, and  
 62 stimulus size, which we verify experimentally. In particular,  
 63 our model accounts for FEM enhancing acuity for stimuli as  
 64 small as receptive field size or smaller, consistent with previous  
 65 reports (5, 9). Further, our experimental results show that  
 66 subjects' FEM amplitude varies depending on stimulus size.  
 67 This has potential benefits for retinal coding, as modeling  
 68 suggests that enhanced acuity can be achieved by varying  
 69 FEM amplitude as subjects do. The results highlight that  
 70 perception is inherently active even at the level of FEM.

## 71 Results

72 To understand how FEM statistics affect visual acuity, we  
 73 first study FEM trajectories during a visual discrimination  
 74 task, in which 17 human subjects must discriminate between  
 75 orientations of a Snellen E in a four-alternative forced choice  
 76 task, where the letter E is displayed at adaptive stimulus sizes  
 77 quantified by the spacing between adjacent bars of the "E" (Fig.  
 78 1a), between 0.3 and 0.8 arcmin. FEM trajectories are recorded  
 79 through eye tracking with an adaptive optics scanning laser  
 80 ophthalmoscope (AOSLO) (one subject's example trajectories  
 81 shown in Fig. 1b). The results reveal trajectories consistent  
 82 with a random diffusion process, in that power scales as  $1/f^2$   
 83 with frequency  $f$  (Fig. 1c), as expected from the literature  
 84 (15), and the squared end-to-end length of trajectories grows  
 85 linearly with time (Fig. 1d, see Supplementary Information for  
 86 derivations in the case of a diffusion process). The slope of this  
 87 proportionality relation, governed by the diffusion constant  $D$   
 88 in a diffusion process, varies substantially across subjects (Fig.  
 89 1e).

90 How do FEM affect visual discrimination? From a theo-  
 91 retical point of view, we must consider the interplay between  
 92 two opposing coding mechanisms which involve the statistics  
 93 of FEM, controlled by  $D$ , the stimulus properties, and the  
 94 response properties of retinal cells (Fig. 2a). On the one hand,  
 95 coding benefits from averaging over noisy spikes by keeping  
 96 the eyes stable (2). Averaging over noise especially supports  
 97 acuity in the case of coarse stimuli, where stimulus features are  
 98 as wide as receptive fields or wider, and stimulus orientation  
 99 can still be identified when the stimulus is downsampled into  
 100 the space of retinal receptive fields (Fig. 2b).

101 On the other hand, temporal encoding of visual stimuli by  
 102 the dynamics of retinal activity benefits from FEM. Indeed,  
 103 FEM refresh the content of receptive fields, which leads to  
 104 more sustained stimulus encoding over time, as well as allow  
 105 for FEM-induced temporal fluctuations in retinal responses,  
 106 which can convey information about small stimulus details.  
 107 For example, in Fig. 2d (bottom row), the stimulus moves  
 108 in and out of a given receptive field under the effect of FEM,  
 109 which results in changes in retinal spiking rate that encode

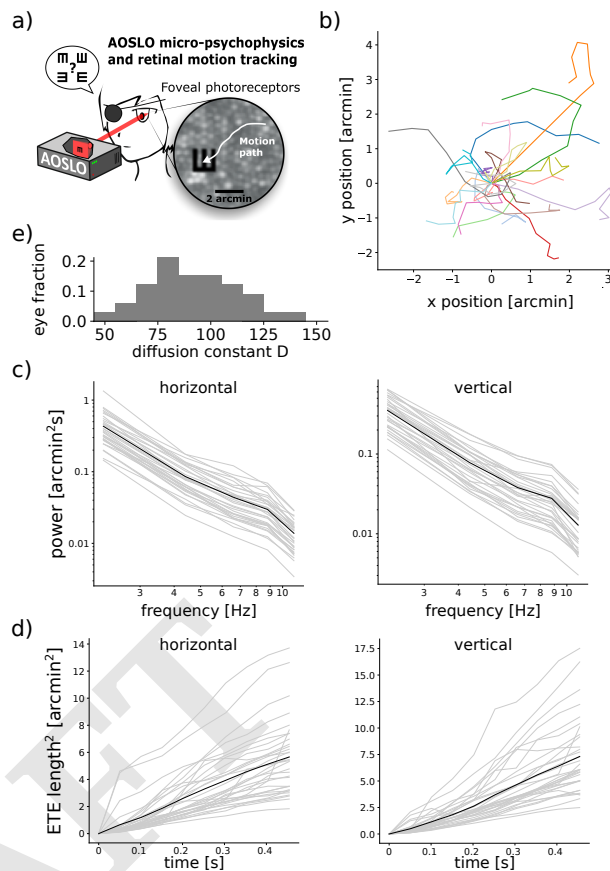

**Fig. 1. FEM are consistent with a random diffusion process, with diffusion constant varying importantly across subjects.** (a) Experimental set-up and frame captured by the AOSLO, showing a subject's retinal photoreceptor mosaic with a visual stimulus and recorded FEM trajectory. (b) Example FEM trajectories aligned to their starting point for one subject across stimulus presentations (colors). (c) Power spectra of FEM trajectories averaged over trials, shown for each subject eye (in grey, mean in black) along horizontal (left) and vertical (right) directions. (d) Mean square end-to-end distance of trajectories shown for each subject eye (in grey, mean in black) along horizontal (left) and vertical (right) axes. (e) Histogram of diffusion constants  $D$ , fitted over all trajectories of all trials and stimuli, for each subject. The results report important inter-subject variability in terms of  $D$ , with the largest  $D$  almost three times larger than the smallest value.

110 relevant information about stimulus position and orientation.  
 111 Temporal coding rendering FEM advantageous is consistent  
 112 with FEM effectively transforming the structure of spatio-  
 113 temporal receptive fields (10, 11), which is believed to enhance  
 114 retinal sensitivity to fine stimulus details (5). This mecha-  
 115 nism appears particularly relevant for stimulus features finer  
 116 than receptive field size, for which retinal encoding amounts  
 117 to downsampling, and intermediate FEM amplitudes. For  
 118 small or vanishing FEM, receptive field contents are constant  
 119 and retinal activity therefore decays over time (Fig. 2d top).  
 120 Conversely, for FEM larger than the size of the small details,  
 121 coding is impaired by the resulting uncertainty on stimulus  
 122 location with respect to the eye. From the interplay between  
 123 these coding mechanisms, one expects that visual acuity de-  
 124 pends non-trivially on both stimulus size and FEM amplitude.

125 To explore the combined effect of these mechanisms, we  
 126 investigate a simple model of retinal responses in the presence  
 127 of FEM. We model FEM as resulting from a two-dimensional  
 128 diffusion process with Poisson step size, controlled by a dif-

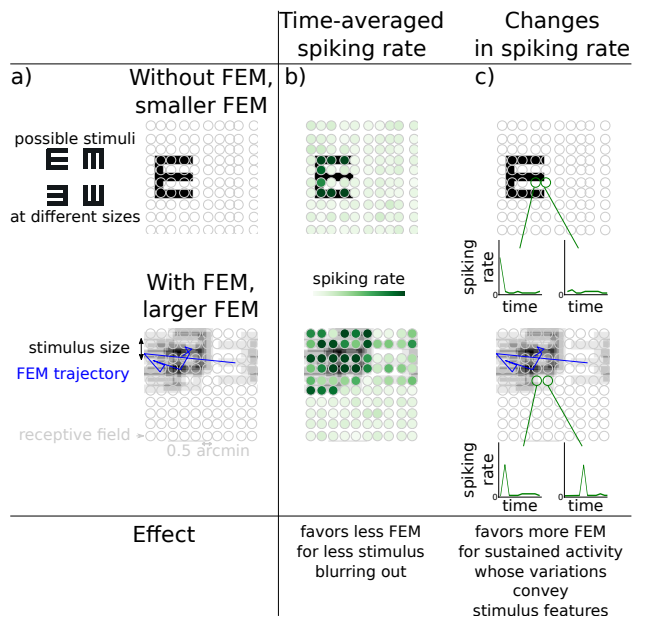

**Fig. 2. Mechanisms by which FEM affects retinal responses and stimulus encoding.** (a) Snellen E stimulus (black) moving alongside schematic FEM trajectory (blue) and projected onto RGC receptive fields (grey) for stable stimuli (top) and jittery stimuli in the presence of FEM (bottom). Each letter E represents the input to the retina at a different point in time. (b) Time averaged spiking rate (green) elicited for each RGC by moving stimuli. In this coding scheme, large FEM result in a blurred out stimulus. Conversely, less to no FEM are favored as they allow to average out noise from stochastic spiking activity by keeping the eye relatively stable through time. (c) Changes in the spiking rate of two example RGCs due to variations in receptive field content caused by FEM. In the absence of FEM, light intensity is constant through time in each receptive field, leading to RGC activity decaying in time. In the presence of FEM, however, RGC responses to stimuli are sustained, and changes in spiking rate can convey stimulus-relevant information.

simulated retinal spikes. The classifier has access to the form of the likelihood of spiking given the stimulus, as well as to the statistics of the eye movements, i.e.,  $D$ , but not their specific trajectory. Starting with no prior knowledge about the stimulus and hence a flat prior distribution, evidence is accumulated from RGC spiking patterns, and the posterior distribution is updated as follows:

$$P(\lambda, x, y | \{\sigma_{t'}\}_{t' \leq t}) = \frac{1}{Z_t} \sum_{x'} \sum_{y'} \underbrace{P(\sigma_t | \lambda, x, y, x', y')}_{\text{likelihood}} \underbrace{P(x, y | x', y')}_{\text{transition matrix}} \underbrace{P(\lambda, x', y' | \{\sigma_{t'}\}_{t' \leq t-1})}_{\text{prior distribution}} \quad [1]$$

where  $\lambda$  denotes the stimulus orientation (top, bottom, left, or right),  $x$  and  $y$  are its centre position in the retina reference frame,  $\{\sigma_{t'}\}_{t' \leq t}$  is the history of spiking patterns across RGCs up to time  $t$ , and  $Z_t$  is a normalization constant.  $P(\sigma_t | \lambda, x, y, x', y')$  is a product of  $P(\sigma_t^i | \lambda, x, y, x', y')$  over all RGCs  $i$  (see Supplementary Information) since the cells are independent and any correlation between their activities comes from the stimulus.  $P(x, y | x', y')$  is the transition matrix governing the diffusion process of FEM, characterized by the diffusion constant  $D$  (see Supplementary Information); namely, the probability that the stimulus moves, during one time step, from coordinates  $(x', y')$  to coordinates  $(x, y)$ .

The orientation of the E for which the posterior is maximized is the classifier's outcome:  $\lambda^* = \text{argmax}_{\lambda} \sum_x \sum_y P(\{\sigma_{t'}\}_{t' \leq t} | \lambda, x, y)$ . Repeating this procedure for 50 trials, one can estimate a fraction of correct discrimination after 500 ms of stimulus presentation (to match experimental conditions), for each value of  $D$  and each stimulus size.

Inspecting how the model gathers evidence from spikes to estimate stimulus orientation, we find that learning occurs for a large range of values of  $D$  as the fraction of correct discrimination increases over time, albeit at different rates depending on  $D$  and stimulus size (Fig. 3). For large stimuli (Fig. 3a), all values of  $D$  allow for near-perfect accuracy, quantified by a fraction of correct discrimination nearing 1, except for  $D = 0$ ; in this case, learning occurs slowly because cells spike sparsely. Intermediate values of  $D$  (between 100 and 300) yield enhanced fractions of correct discrimination. Finally, a larger value of  $D$  is associated with lower fraction of correct discrimination for stimulus sizes smaller than the receptive field size, as well as slower learning for larger stimulus sizes. This can be understood in terms of the interplay between mechanisms: very small  $D$  does not allow refreshing receptive fields or encoding through differences in spiking rate (Fig. 2d), while very large  $D$  prevents staying around the same position for long enough to average over spiking activity (Fig. 2c). The optimal value of  $D$  is observed to vary non-trivially with stimulus size due to interactions between the opposing coding mechanisms. Indeed, too small eye movements do not enable time-sustained coding with stimulus-relevant time fluctuations in RGC spiking rate, and too large values of  $D$  are detrimental to coding as averaging over noise is impaired when stimuli moves too fast with respect to the retina. Overall, the interaction between mechanisms gives rise to an optimal value

fusion constant  $D$  (see Methods for details). We model the spiking activity of retinal ganglion cells (RGC) at the foveola, assuming one-to-one correspondence with photoreceptors (16), in response to stimuli moving in the retina's reference frame. RGC receptive fields are arranged into a mosaic (Fig. 1a). Each RGC's spiking rate in response to stimuli is characterized by a spatio-temporal kernel: spatial receptive fields are Gaussian with circular symmetry, and temporal receptive fields render RGCs sensitive to temporal changes in light intensity, as in transient RGCs. From simulated spiking rates, RGC spikes are drawn according to a Poisson process. The only free parameters are the temporal kernel time scale as well as the gain of RGCs and baseline level of RGC activity, which control the sensitivity to stimuli and the spiking rate in the absence of stimuli, respectively. The parameters are set based on the previous literature on RGC models (2, 3) informed by recordings in the primate retina (17, 18), in particular to ensure that RGC spiking rates remain lower than 200 Hz. Hence, the likelihood of spiking given the stimulus can be estimated precisely in the model.

The amount of stimulus-relevant evidence conveyed by RGC spikes can then be quantified across stimulus sizes and  $D$  values, with a Bayesian classifier as an ideal model for how the rest of the brain processes information from retinal spikes. This classifier is optimal in that it accumulates all the information available in spiking activity, thus yielding the best possible accuracy at classifying stimuli given the

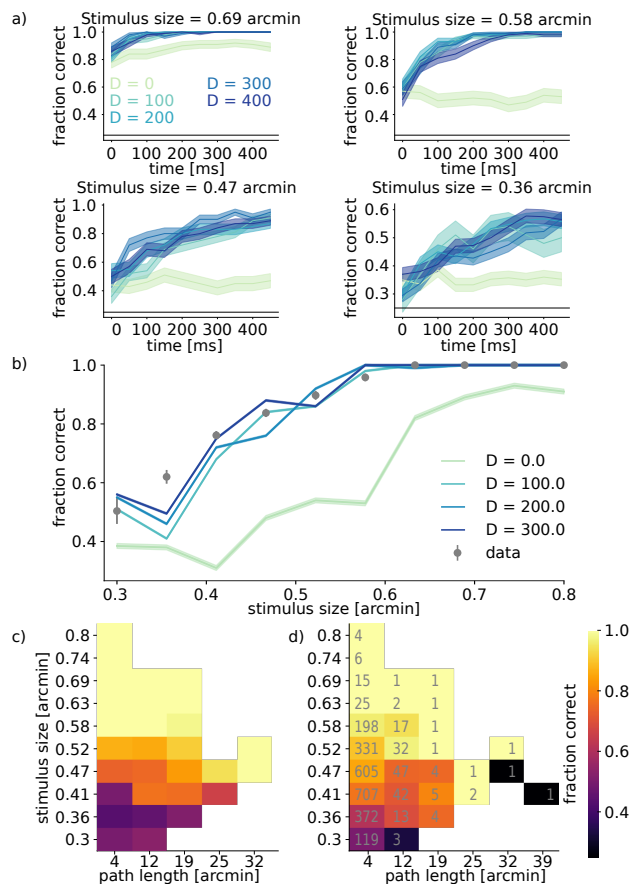

**Fig. 3. Bayesian classifier predicts that accuracy in visual discrimination tasks non-trivially depends on stimulus size and FEM amplitude, which is verified in empirical data on a trial-by-trial basis.** (a) Classifier accuracy through time for different values of  $D$  (darker blue: larger  $D$ ) and different stimulus sizes (decreasing size from top to bottom and left to right). Black line denotes the chance level fraction correct at 0.25. All fractions of correct discrimination increase through time. (b) Empirical (gray circles) and model-predicted (blue lines, darker blue for larger  $D$ ) fraction of correct discrimination after 500 ms of simulation, as a function of stimulus size. Fraction of correct discrimination increases with stimulus size within a similar range for data and model, however the absence of FEM ( $D = 0$ ) impairs accuracy across stimuli. (c-d) Heatmap of fraction of correct discrimination in bins of path length and stimulus size in the model (c) and data (d). For empirical values, the numbers in gray denote the number of trials per bin. Only bins where empirical path lengths were empirically recorded for those particular stimuli were represented. In these bins, the model predictions agree with empirical findings.

we examine the fraction of correct discrimination of the subjects as a function of both stimulus size and path length of FEM, defined as the total amplitude of the stimulus trajectory with respect to the eye in a trial. In order to compare with empirical observations, we consider the simulated fraction of correct discrimination for a range of values of  $D$  matching the range found in subjects (Fig. 1e). Then, we compute a weighted average of the fraction of correct discrimination across values of  $D$ , where weights correspond to how heavily represented each value of  $D$  is across subjects (Fig. 1e). Once again, we find agreement between data and model (Fig. 3c,d). For stimuli larger than the typical size of RGC receptive fields at the preferred retinal location of fixation on the retina (0.5 arcmin), discrimination is near-perfect across path lengths. However, for finer stimuli, our results suggest that the fraction of correct discrimination improves for larger path length, down to very fine stimuli at the limit of human acuity (0.3 arcmin).

Which mechanism explains the beneficial effect of FEM for visual decoding and acuity? The more immediate answer, namely that FEM refresh the image on the retina and thereby enhance spiking, is insufficient. To illustrate this point, we repeated our theoretical study using modified model RGC with a monomodal temporal filter, such that the model RGC responds to light intensity rather than temporal variations of it ( $w = 0$  in Eq. 4). In this case, RGC response is not transient, and FEM are no longer necessary to elicit sustained RGC spiking. In this modified model, overall acuity deteriorates as expected, which confirms the relevance of the transient nature of RGC spiking to reproduce experimental results. Still, however, larger FEM path length boosts the fraction of correct discrimination for stimuli as fine as or finer than the receptive field size, consistent with empirical data (Supplementary Information, Fig. S1). Thus, the ‘refresh mechanism’ is not alone responsible for the benefits of FEM; in addition, temporal modulations of RGC activity caused by FEM convey stimulus-relevant information that enhances the visual acuity of an ideal decoder.

Surprisingly, we also note that the range of observed path lengths depends considerably on stimulus size. Indeed, path lengths are found to be up to five times larger for intermediate stimulus size (0.5 arcmin, comparable to RF size) than for the largest stimulus size (0.8 arcmin).

In sum, our results show that the empirical and model amplitude of FEM influences visual coding and discrimination on a trial-by-trial basis. Especially for stimuli finer than receptive fields, for which coding through changes in neural activity upon eye motion is especially relevant, longer FEM trajectories are favored. The model quantitatively captures experimental results by taking this mechanistic element into account. Indeed, our model explains how fine detail vision deteriorates in the absence of FEM, consistent with the experimental literature (5). Additionally, simulations quantitatively reproduce variations of the fraction of correct discrimination as a function of stimulus size and path length of FEM. Note that among model parameters, only  $D$  is fitted from empirically recorded FEM trajectories, and no parameters are adjusted to reproduce subjects’ fractions of correct discrimination. Surprisingly, the path length empirical FEM is found to vary depending on stimulus size - are these variations robust, and if so, do they influence retinal coding?

Quantifying the variations of FEM path lengths with stim-

of  $D$  that increases first and then decreases with stimulus size in model predictions, which can be tested in empirical data.

We compare the fraction of correct 500 ms trials from simulations and human subjects. First, we compute the mean fraction of correct discrimination over all subject eyes and trials, as a function of stimulus size. As expected, both the model and subjects discriminate large stimuli more accurately. Across values of  $D$ , the model displays good agreement with the data; as simulated fractions of correct discrimination across values of  $D$  lie in the same range as empirical ones, between 60% and 100% correct answers (Fig. 3b). It is also worth noting that the absence of FEM ( $D = 0$ , lightest teal line in Fig. 3b) yields poorer results, in agreement with empirical evidence that stabilizing stimuli on the retina impairs the ability to discriminate between stimuli (4, 5).

To investigate for which stimuli FEM are the most helpful,

285 ulus size, we observe that significant differences can be noted  
 286 overall in path lengths across stimulus sizes (Fig. 4a, Kruskal-  
 287 Wallis test,  $H = 99$ ,  $p = 10^{-17}$ ). In particular, statistical  
 288 testing shows that path lengths for stimuli between 0.4 arcmin  
 289 and 0.5 arcmin, near the subjects' acuity threshold, were sig-  
 290 nificantly different from others. Can observed changes in FEM  
 291 amplitude across stimuli support retinal coding and visual  
 292 acuity? We examine whether varying FEM amplitude across  
 293 stimulus sizes, as subjects do, leads to improved acuity, as  
 294 compared to keeping FEM amplitude fixed or varying FEM  
 295 amplitude in different ways.

296 To that purpose (Fig. 4), we fit  $D$  separately for each  
 297 stimulus size and each subject (Fig. 4b top); we compare this  
 298 case to that of a fixed value of  $D$  equal to the average empirical  
 299  $D$  over stimuli (Fig. 4b middle), and to that of values of  $D$   
 300 shuffled across stimulus sizes (Fig. 4b bottom). Using our  
 301 model, five trials are then simulated for each value of  $D$  per  
 302 subject eye and per stimulus size, successively for empirical,  
 303 averaged, and shuffled values of  $D$ . From the fraction of correct  
 304 discrimination (Fig. 4c), we observe that varying  $D$  across  
 305 stimuli according to empirical values yields an accuracy at the  
 306 task similar to that of human subjects, as well as consistently  
 307 enhanced acuity over keeping  $D$  constant or using shuffled  
 308 values of  $D$  (Fig. 4d).

309 We note that free parameters in the model are not read-  
 310 justed to resemble psychophysical results; as they are chosen to  
 311 reflect RGC electrophysiological properties and kept constant  
 312 throughout the manuscript. In particular, we observe that  
 313 for a certain range of stimulus sizes smaller than foveal RGC  
 314 receptive fields and near the limit of human acuity, the frac-  
 315 tion of correct discrimination is enhanced on average by over a  
 316 standard error in the mean and up to 10% when modeling  
 317 empirical, stimulus-dependent  $D$  compared to when model-  
 318 ing averaged, stimulus-independent  $D$  or values of  $D$  shuffled  
 319 across stimulus sizes (Fig. 4c). For smaller stimulus sizes (0.3  
 320 arcmin), the subjects and model perform poorly regardless of  
 321 the values assigned to  $D$ . For stimuli larger than typical re-  
 322 ceptive field size (0.5 arcmin), the subjects and model perform  
 323 near-perfectly across all values of  $D$ .

324 We conduct several additional analyses (data not shown)  
 325 to check the robustness of our results. For example, we apply  
 326 different shuffling protocols, that conserve the dependence of  
 327  $D$  on either fine or coarse scales of stimulus size; these analyses  
 328 yield similar performance. We cannot exclude that the form  
 329 of variations in  $D$  is incidental to this specific behavioral  
 330 experiment, and happens to yield a superior performance in  
 331 the model. Indeed, we are not able to characterize a simple  
 332 form of the variations of  $D$  as a function of stimulus size. Yet,  
 333 the conclusion that a variable value of  $D$  enhances visual acuity  
 334 remains. The variations in  $D$  measured in human subjects  
 335 suggest that, not only can FEM benefit the resolution of fine  
 336 visual details, but they can do so actively through modulations  
 337 of their amplitude according to stimulus size. Thus, vision  
 338 may be active even at the scale of FEM.

## 339 Discussion

340 In this work, we investigated the conditions under which FEM  
 341 help or harm retinal coding and visual acuity. Empirical FEM  
 342 trajectories were recorded in healthy human subjects during  
 343 a discrimination task, and empirical FEM amplitudes were  
 344 estimated for all subjects and stimulus sizes (Fig. 1). FEM

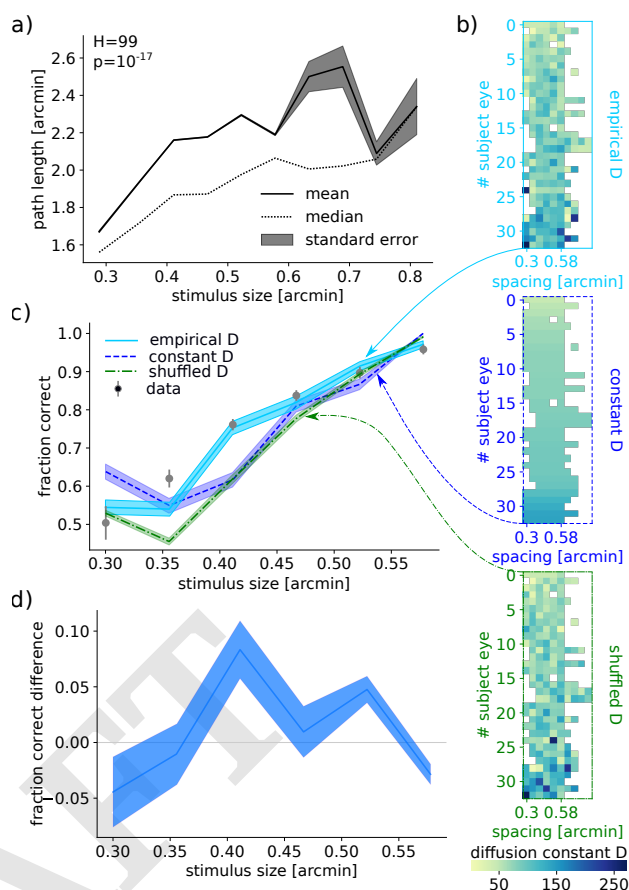

**Fig. 4. Variations in subjects' FEM amplitude depending on stimuli lead to enhanced retinal coding.** (a) Path length statistics as a function of stimulus size: the mean (black line), standard error of the mean (shaded area), and median (dotted line) are computed over all FEM trajectories for all subject eyes within bins of stimulus size. (b) Model-predicted fraction of correct discrimination for empirical stimulus-dependent (top), stimulus-independent (middle)  $D$ , and shuffled  $D$  across stimuli (bottom) shown as function of stimulus size. (c) Empirical (gray circles) and model-predicted fraction of correct discrimination for empirical (solid line), constant (dashed), and shuffled (dash-dotted)  $D$ . (d) Model-predicted difference in fraction of correct discrimination between trials with empirical  $D$  varying across stimuli (b, solid) and fixed  $D$  chosen to be the mean over sizes (b, dashed), as a function of stimulus size. Lines represent means, and shaded areas represent standard errors in the mean.

345 amplitude and its relation to stimulus size non-trivially affect  
 346 acuity, through an intricate interplay of different mechanisms:  
 347 averaging over noisy spiking RGC activity, and temporal cod-  
 348 ing through refreshing the content of receptive fields, resulting  
 349 in stimulus-informative variations in spiking (Fig. 2). Using  
 350 the output of a model of retinal response to diffusing visual  
 351 stimuli, an ideal Bayesian classifier successfully accounted for  
 352 the benefits of FEM to discriminate fine stimuli (Fig. 3). The  
 353 model of fraction of correct discrimination was found to quali-  
 354 tatively match human subject performance at the task, even  
 355 though no model parameters were fitted to empirical fractions  
 356 of correct discrimination, and only the diffusion constant of  
 357 modeled FEM was fitted to recorded FEM trajectories. In  
 358 addition, we noticed that subjects' FEM path lengths varied  
 359 with stimulus size. Our model predicted that empirically  
 360 observed changes in FEM size across stimuli lead to improve-  
 361 ments in visual acuity (over fixed-sized FEM), suggesting that  
 362 perception can benefit from being active even at the scale of  
 363 FEM (Fig. 4).

364 While earlier modeling work on interpreting spikes in the  
365 presence of FEM had suggested stimulus encoding and decoding  
366 was possible in spite of FEM (2, 3), our work establishes  
367 that FEM are able to not only allow, but also to enhance the  
368 encoding and decoding of task-relevant information, thereby  
369 accounting for experimental observations (5). Furthermore,  
370 our work uncovers a relation between the (fine) spatial scale  
371 of visual stimuli and the role of the FEM amplitude. When  
372 one considers the opposing mechanisms of noise averaging  
373 (which favors lower values of  $D$ ) and of the response dynamics  
374 (which favors higher values of  $D$ ), non-zero, optimal value of  
375  $D$ , varying with stimulus size, emerges. This notion of optimal  
376 FEM statistics for stimulus encoding is complementary with  
377 existing ideas that focused on stimulus statistics, suggesting  
378 that scale-invariant eye movements effectively transform the  
379 visual input so as to enhance our perception of fine detail  
380 (5, 10). Our results quantitatively addresses the statistics of  
381 FEM and shows that optimal values of  $D$  for the encoding  
382 stimulus-relevant information vary depending on spatial fre-  
383 quencies present in stimuli. Recent modeling work exploring  
384 yet an additional mechanism, namely that encoding can take  
385 advantage of spatial heterogeneities in the retinal receptive  
386 field mosaic through FEM, also found benefits of FEM to  
387 visual coding (19). Our conclusions are complementary in  
388 that they exploit different mechanisms through which FEM  
389 enhance retinal coding.

390 Our experimental findings indicate that subjects can change  
391 the amplitude of their FEM during sustained fixation depend-  
392 ing on stimulus size. This agrees with observations in the  
393 recent literature that empirical FEM statistics change in a  
394 task-dependent manner. In particular, the amplitude, speed,  
395 and curvature of FEM drift and microsaccades were reported  
396 to be distinct between passive viewing and acuity tasks (20). In  
397 addition, recent work in primates supports that FEM originate  
398 from central neural circuitry generating noise that controls  
399 FEM statistics (21), which is consistent with subjects' ability  
400 to modulate FEM amplitude according to stimuli.

401 While we have discussed coding mechanisms at the reti-  
402 nal level, other mechanisms and their associated costs may  
403 also incur, including motor costs in quelling noisy and jittery  
404 motion to reduce FEM amplitude. There may be conditions  
405 under which FEM amplitude is suboptimal, and acuity is en-  
406 hanced by partially stabilizing stimuli on the retina (22). The  
407 perspective we propose on the effect of FEM on perception  
408 provides quantitative predictions for how subject acuity varies  
409 with FEM amplitude, to be tested in future psychophysical  
410 experiments in which FEM size may be effectively enhanced  
411 or reduced by amplifying or compensating for motion through  
412 eye tracking. More broadly, our findings suggest that active  
413 sensing is relevant even down to fine spatio-temporal scales  
414 where noise plays a key role in shaping neural coding and  
415 sculpting human behavior.

## 416 Materials and Methods

417  
418 **Adaptive optics microstimulation.** High resolution retina tracking  
419 during presentation of a small optotype was achieved by employing  
420 a custom adaptive optics scanning laser ophthalmoscope (AOSLO).  
421 In such a system, cone-resolved imaging and presentation of a visual  
422 stimulus is accomplished concurrently (23–25) (see SI for details).

**Visual acuity task and retina tracking.** All 17 adult participants (8  
male, 9 female, age: 10 – 42 years) took part in a visual acuity task.  
Participants had to indicate the orientation of a Snellen-E stimulus,  
presented randomly at one of four orientations (up, down, left, right).  
Each stimuli was presented for 500 ms at the center of the AOSLO  
raster after the participants initialized a trial with a keyboard press.  
Stimulus size during a trial was fixed, and was changed between  
trials following a Bayesian adaptive staircase procedure (QUEST  
(26)). Stimulus size decreased if the most recent response was  
correct, and increased at incorrect responses. Each experimental  
run consisted of 20 trials yielding stimulus gap sizes roughly between  
0.3 and 0.8 arcmin. More than 20 trials were conducted in case  
some trials had to be discarded due to eye blinks, saccades, or eye  
tracking artefacts. Experimental runs were repeated five times for  
each eye of each participant (except one participant in whom only  
one eye was tested). With each stimulus presentation, a 1 s AOSLO  
video was recorded, from which retinal motion and stimulus position  
were extracted (27, 28). Retinal motion and thus eye motion traces  
during stimulation were extracted by a real-time, strip-wise image  
registration and stabilisation technique (29), with effective temporal  
sampling of  $\sim 960$  Hz. Trials containing defects of eye-tracking  
stabilisation or microsaccades were identified by visual inspection  
(see SI for details).

**Retinal response model.** Modeled RGC receptive fields are arranged  
into a mosaic reminiscent of Fig. 1a, which we simulate as a square  
lattice with jittered centre positions and receptive field sizes. Each  
receptive field is characterized by a spatial and temporal kernel. The  
spatial kernel is Gaussian with circular symmetry. The temporal  
kernel accounts for the fact that spiking activity decays to silence  
when the same fixed stimulus is shown within a time scale of the  
order of  $dt = 50$ ms (2), and is implemented by subtracting the light  
intensity observed 50ms ago, weighted by a kernel weight, from the  
current intensity within the receptive field. Subsequently, to obtain  
RGC spiking rates, we multiply the stimulus after applying the  
spatiotemporal receptive field kernel by a constant gain, and add a  
baseline that controls RGC spiking rate in obscurity. Then, spikes  
are drawn from a Poisson process with said spiking rate. Equation  
4 describes RGC spiking rate and spiking probability in response to  
light stimuli.

$$r(t) = r_0 + \Delta r \left( \int \int dx dy S(x_t, y_t) RF(x, y) \right) \quad [2]$$

$$- w \int \int dx dy S(x_{t-1}, y_{t-1}) RF(x, y) \Big), \quad [3]$$

$$P(\sigma(t) = n) = \frac{r(t)^n}{n!} e^{-r(t)} \quad [4]$$

with  $r(t)$  the RGC's spiking rate at time  $t$ ,  $r_0 = 100$  Hz its base-  
line spiking rate in the absence of stimuli,  $\Delta r = 500$  Hz its gain  
controlling sensitivity to light intensity,  $RF$  its spatial receptive  
field specific to each neuron,  $0 < w < 1$  the temporal kernel weight,  
 $S(x_t, y_t)$  the two-dimensional stimulus centred onto position  $(x_t, y_t)$   
the coordinates of the stimulus at time  $t$ ,  $\sigma(t)$  the number of spikes  
fired by the RGC at time  $t$ , and  $n$  a non-negative integer. For  
computation purposes, all possible positions  $(x, y)$  are described  
by coordinates upon a discrete square grid and cyclic boundary  
conditions are applied. Parameter values for  $dt$ ,  $r_0$ , and  $\Delta r$  are  
chosen based on retinal recordings (17, 18) and previous modelling  
work (2, 3).

**ACKNOWLEDGMENTS.** The authors acknowledge Simone  
Blanco Malerba and Luc Stebens for useful discussion. Support for  
this research was provided by the CNRS through Unité Mixte de  
Recherche (UMR) 8023, the Swiss National Science Foundation Sin-  
ergia Project (CRSII5\_173728), the Carl Zeiss Foundation (WMH:  
HC-AOSLO) and the Emmy Noether Program of the German Re-  
search Foundation (DFG) (WMH: Ha 5323/5-1).

1. DW Arathorn, SB Stevenson, Q Yang, P Tiruveedhula, A Roorda, How the unstable eye sees a stable and moving world. *J. Vis.* 13, 22–22 (2013).

- 467 2. Y Burak, U Rokni, M Meister, H Sompolsky, Bayesian model of dynamic image stabilization  
468 in the visual system. *Proc. Natl. Acad. Sci.* **107**, 19525–19530 (2010).
- 469 3. X Pitkow, H Sompolsky, M Meister, A neural computation for visual acuity in the presence  
470 of eye movements. *PLoS biology* **5**, e331 (2007).
- 471 4. M Rucci, G Desbordes, Contributions of fixational eye movements to the discrimination of  
472 briefly presented stimuli. *J. Vis.* **3**, 18–18 (2003).
- 473 5. M Rucci, R Iovin, M Poletti, F Santini, Miniature eye movements enhance fine spatial detail.  
474 *Nature* **447**, 852–855 (2007).
- 475 6. BL Guthrie, JD Porter, DL Sparks, Corollary discharge provides accurate eye position infor-  
476 mation to the oculomotor system. *Science* **221**, 1193–1195 (1983).
- 477 7. I Donaldson, The functions of the proprioceptors of the eye muscles. *Philos. Transactions*  
478 *Royal Soc. London. Ser. B: Biol. Sci.* **355**, 1685–1754 (2000).
- 479 8. I Murakami, P Cavanagh, Visual jitter: Evidence for visual-motion-based compensation of  
480 retinal slip due to small eye movements. *Vis. research* **41**, 173–186 (2001).
- 481 9. K Ratnam, N Domdei, WM Harmening, A Roorda, Benefits of retinal image motion at the  
482 limits of spatial vision. *J. vision* **17**, 30–30 (2017).
- 483 10. X Kuang, M Poletti, JD Victor, M Rucci, Temporal encoding of spatial information during active  
484 visual fixation. *Curr. Biol.* **22**, 510–514 (2012).
- 485 11. M Rucci, M Poletti, Control and functions of fixational eye movements. *Annu. review vision*  
486 *science* **1**, 499–518 (2015).
- 487 12. M Rucci, JD Victor, The unsteady eye: an information-processing stage, not a bug. *Trends*  
488 *neurosciences* **38**, 195–206 (2015).
- 489 13. M Rucci, Visual encoding with jittering eyes. *Adv. Neural Inf. Process. Syst.* **18**, 1137–1144  
490 (2005).
- 491 14. M Rucci, A Casile, Fixational instability and natural image statistics: implications for early  
492 visual representations. *Network: Comput. Neural Syst.* **16**, 121–138 (2005).
- 493 15. SB Stevenson, A Roorda, G Kumar, Eye tracking with the adaptive optics scanning laser oph-  
494 thalmoscope in *Proceedings of the 2010 symposium on eye-tracking research & applications*.  
495 pp. 195–198 (2010).
- 496 16. C Zhang, et al., Circuit reorganization shapes the developing human foveal midget connec-  
497 tome toward single-cone resolution. *Neuron* **108**, 905–918 (2020).
- 498 17. E Chichilnisky, RS Kalmar, Functional asymmetries in on and off ganglion cells of primate  
499 retina. *J. Neurosci.* **22**, 2737–2747 (2002).
- 500 18. J Troy, B Lee, Steady discharges of macaque retinal ganglion cells. *Vis. neuroscience* **11**,  
501 111–118 (1994).
- 502 19. AG Anderson, K Ratnam, A Roorda, BA Olshausen, High-acuity vision from retinal image  
503 motion. *J. vision* **20**, 34–34 (2020).
- 504 20. NR Bowers, J Gautier, S Lin, A Roorda, Fixational eye movements in passive versus active  
505 sustained fixation tasks. *J. Vis.* **21**, 16–16 (2021).
- 506 21. N Ben-Shushan, N Shaham, M Joshua, Y Burak, Fixational drift is driven by diffusive dynam-  
507 ics in central neural circuitry. *Nat. Commun.* **13**, 1–13 (2022).
- 508 22. MN Ağaoğlu, CK Sheehy, P Tiruveedhula, A Roorda, ST Chung, Suboptimal eye movements  
509 for seeing fine details. *J. vision* **18**, 8–8 (2018).
- 510 23. S Poonja, S Patel, L Henry, A Roorda, Dynamic visual stimulus presentation in an adaptive  
511 optics scanning laser ophthalmoscope (2005).
- 512 24. A Roorda, et al., Adaptive optics scanning laser ophthalmoscopy. *Opt. express* **10**, 405–412  
513 (2002).
- 514 25. WM Harmening, WS Tuten, A Roorda, LC Sincich, Mapping the perceptual grain of the hu-  
515 man retina. *J. Neurosci.* **34**, 5667–5677 (2014).
- 516 26. AB Watson, DG Pelli, Quest: A bayesian adaptive psychometric method. *Percept. & psy-*  
517 *chophysics* **33**, 113–120 (1983).
- 518 27. JL Reiniger, N Domdei, FG Holz, WM Harmening, Human gaze is systematically offset from  
519 the center of cone topography. *Curr. Biol.* **31**, 4188–4193 (2021).
- 520 28. N Domdei, JL Reiniger, FG Holz, WM Harmening, The relationship between visual sensitivity  
521 and eccentricity, cone density and outer segment length in the human foveola. *Investig.*  
522 *Ophthalmol. & Vis. Sci.* **62**, 31–31 (2021).
- 523 29. Q Yang, DW Arathorn, P Tiruveedhula, CR Vogel, A Roorda, Design of an integrated hard-  
524 ware interface for aoslo image capture and cone-targeted stimulus delivery. *Opt. express* **18**,  
525 17841–17858 (2010).

# PNAS

[www.pnas.org](http://www.pnas.org)

1

## 2 **Supplementary Information for**

### 3 **Fixational eye movements as active sensation for high visual acuity**

4 **Trang-Anh E. Nghiem, Oscar Dufour, Jenny L. Reiniger, Wolf M. Harmening, Rava Azeredo da Silveira**

5 **Corresponding Authors: Trang-Anh E. Nghiem, Rava Azeredo da Silveira.**

6 **E-mail: [trang-anh.nghiem@cantab.net](mailto:trang-anh.nghiem@cantab.net), [rava@ens.fr](mailto:rava@ens.fr)**

#### 7 **This PDF file includes:**

- 8     Supplementary text
- 9     Fig. S1 (not allowed for Brief Reports)
- 10    SI References



## 11 Supporting Information Text

12 **Adaptive optics microstimulation.** High resolution retina tracking during presentation of a small optotype was achieved by  
 13 employing a custom adaptive optics scanning laser ophthalmoscope (AOSLO). In such a system, cone-resolved imaging and  
 14 presentation of a visual stimulus is accomplished concurrently. The techniques have been described earlier (1–3), we mention  
 15 only pertinent details here. In brief, the output of a supercontinuum light source (SuperK Extreme, NKT Photonics, Denmark)  
 16 was spectrally filtered to create a red visible light channel, used for imaging, ocular wavefront sensing and microstimulation  
 17 (center wavelength =  $788 \pm 12$  nm, FF01-788/12-25, Semrock, Rochester, USA). Adaptive optics correction, run in closed  
 18 loop operation at about 25 Hz, consisted of a Shack-Hartmann wavefront sensor (SHSCam AR-S-150-GE, Optocraft GmbH,  
 19 Erlangen, Germany) and a magnetic 97-actuator deformable mirror (DM97-08, ALPAO, Montbonnot-Saint-Martin, France).  
 20 The imaging/stimulation beam was point-scanned across the retina, spanning a square field of  $0.85 \times 0.85$  degrees of visual angle.  
 21 The light reflected from the retina was detected in a photomultiplier tube (H7422-50, Hamamatsu Photonics, Hamamatsu,  
 22 Japan) which was placed behind a confocal pinhole (pinhole diameter =  $20 \mu\text{m}$ , equaling 0.5 Airy disk diameters). PMT  
 23 signals were sampled at 20 MHz by a FPGA board (ML506, Xilinx, San Jose, USA), producing digital video frames at  $\sim 30$   
 24 Hz with a spatial resolution of 600 pixels per degree of visual angle. By modulating the intensity of the imaging beam by  
 25 an acousto-optic modulator (TEM-250-50-10-2FP, Brimrose, Maryland, USA), visual stimuli were created (thus a ‘light off’  
 26 stimulus within the visible scanning background, see main paper Fig. 1a).

27 **Data pre-processing.** Trials containing defects of eye-tracking stabilisation or microsaccades were identified by visual inspection  
 28 of stabilized AOSLO videos and eye motion trajectories obtained from eye-tracking. Trials presenting sheared or trapezoid video  
 29 frames associated with trajectories displaying large displacements within a single time frame were identified as stabilization  
 30 failures and were discarded from subsequent analyses. For analysis, eye motion trajectories were downsampled to a 50 ms time  
 31 bin to average over the AOSLO scanning over the recording frame pixel per pixel over 33 ms cycles.

32 **Diffusion process and end-to-end length.** Let  $\mathbf{R}$  be the vector connecting the initial position of the eye to its position after  
 33  $N_t$  steps of duration  $\Delta t$ . We can write  $\mathbf{R} = \sum_{i=1}^{N_t} \mathbf{r}_i$ , where the displacement vector at each of  $N_t$  steps is given by  
 34  $\mathbf{r}_i = \ell(X_i \mathbf{u}_i + Y_i \mathbf{v}_i)$ ;  $X$  and  $Y$  are iid Poisson random variables with mean  $a$  and variance equal to the mean,  $\ell$  is the smallest  
 35 possible non-zero step size,  $\mathbf{u}_i$  is a vector of norm 1 and phase drawn equiprobably from  $\{0, \pi\}$  and respectively  $\mathbf{v}_i$  is a vector  
 36 of norm 1 and phase drawn equiprobably from  $\{-\pi/2, \pi/2\}$ . We compute the variance of the component of  $\mathbf{R}$  along the x axis,  
 37  $R_x = \sum_{i=1}^{N_t} \ell X_i u_{ix}$ .

$$38 \quad \text{Var}(R_x) = \langle R_x^2 \rangle - \langle R_x \rangle^2 = \langle R_x^2 \rangle \quad [1]$$

39 by symmetry of  $\mathbf{R}_x$  around 0 due to equiprobable leftward and rightward displacements.  
 The second moment can be calculated as follows:

$$40 \quad \langle R_x^2 \rangle = \ell^2 \sum_i \sum_j \langle X_i X_j \rangle \langle u_{ix} \cdot u_{jx} \rangle \quad [2]$$

$$41 \quad = \ell^2 \left\langle \sum_i \sum_j X_i X_j u_{ix} \cdot u_{jx} \right\rangle \quad [3]$$

$$42 \quad = \ell^2 \sum_i \sum_j \langle X_i X_j \rangle \delta_{ij} \quad [4]$$

$$43 \quad = \ell^2 \sum_i \langle X_i^2 \rangle \quad [5]$$

$$44 \quad = N_t \ell^2 \langle X^2 \rangle \quad [6]$$

$$45 \quad = N_t \ell^2 [\langle X \rangle^2 + \text{Var}(X)] \quad [7]$$

$$46 \quad = N_t \ell^2 (a^2 + a), \quad [8]$$

47 where we have used the properties of the Poisson process,  $X$ .

48 To compute  $a$  from  $\langle R_x^2 \rangle$ , we solve the quadratic equation and retain the positive solution,  $a = \frac{\sqrt{1 + 4 \frac{\langle R_x^2 \rangle}{N_t \ell^2}} - 1}{2}$ . In addition, we  
 49 recall that  $a = 2D\Delta t$ . Therefore, by fitting the slope  $\alpha$  of the square end-to-end length as a function of time, one can express  
 50 the diffusion constant as a function of  $\alpha$ , as

$$51 \quad D = \frac{\sqrt{1 + 4 \frac{\alpha \Delta t}{\ell^2}} - 1}{4 \Delta t}. \quad [9]$$

52 By symmetry, the same is true for the trajectory projection along the y axis.

46 **Diffusion constant fitting.** The diffusion constant can be estimated from the data by using Eq. 9, with  $\ell = 0.1$  arcmin the  
 47 minimum step size we used in discretizing FEM and  $\alpha$  obtained by fitting the slope of the square end-to-end length in either x  
 48 or y axis as a function of time. We note that if FEM were realizations of perfect random walks, with each step's direction  
 49 uncorrelated from the previous one, the same  $D$  value would be obtained by fitting from either FEM trajectory path lengths  
 50 or end-to-end lengths. However, small discrepancies in  $D$  values may arise. We approximate FEM as a random walk in the  
 51 interest of maintaining reasonable computational burden for Bayesian classification, even though evidence suggests that small  
 52 directional correlations exist at longer time scales than our 50 ms time step, rendering FEM trajectories slightly smoother than  
 53 those described by our simple random walk model (4, 5).

54 **Power-spectral density.** We want to compute the power-spectral density,  $S(f)$ , of the random iid process,  $R_x$  (and equivalently  
 55  $R_y$ ). By the central limit theorem, as  $N_t$  tends to infinity,  $R_x$  is well approximated by a Gaussian continuous random variable  
 56  $W(t)$ , of mean 0 and variance  $\ell^2(a + a^2) \frac{t}{\Delta t}$  (Eq. 8, with  $t = N_t \Delta t$ ). In the continuous limit, we have:

$$57 \quad R_x = W(t) = \int_0^t \xi(s) ds, \quad [10]$$

58 where  $\xi(s)$  is continuous white noise whose moments are  $\langle \xi(s) \rangle = 0$  and  $\langle \xi(s)\xi(s') \rangle = \frac{\ell^2(a+a^2)}{\Delta t} \delta(s - s')$ . The power-spectral  
 59 density is obtained as (6, 7):

$$60 \quad S(f) = \lim_{T \rightarrow +\infty} \left\langle |\widehat{W_T}(t)|^2 \right\rangle, \quad [11]$$

61 where  $\widehat{\phantom{x}}$  denotes the Fourier transform and  $W_T(t)$  is  $W(t)$  truncated at time  $T$ . Explicitly,  $W_T(t) = W(t)\mathbb{1}_{[0,T]}(t)$  where  $\mathbb{1}$  is  
 62 the indicator function of the interval  $[0, T]$ . We use the following convention for the Fourier transform:

$$63 \quad \widehat{W_T}(t)(f) = \frac{1}{\sqrt{T}} \int_0^T e^{-2i\pi f t} W(t) dt. \quad [12]$$

64  $S(f)$  can then be written as

$$65 \quad S(f) = \lim_{T \rightarrow +\infty} \frac{1}{T} \int_0^T dt \int_0^T dt' e^{2i\pi f(t-t')} \langle W(t)W(t') \rangle. \quad [13]$$

66 From Eq. 10, we can compute, the correlation term:  $\langle W(t)W(t') \rangle = \int_0^t \int_0^{t'} \langle \xi(s)\xi(s') \rangle ds ds' = \frac{\ell^2(a+a^2)}{\Delta t} \min(t, t')$ . To compute  
 67  $S(f)$ , first we divide the double integral on the square into an integral on the upper triangle and another on the lower triangle,  
 68 to deal with the term  $\min(t, t')$ . Then, recognizing that one double integral is the conjugate of the other, we rewrite the sum as  
 69 twice the real part. The double integral is then calculated as:

$$\begin{aligned} 70 \quad S(f) &= \lim_{T \rightarrow +\infty} \frac{1}{T} \frac{\ell^2(a+a^2)}{\Delta t} \int_0^T dt \int_0^T dt' e^{2i\pi f(t-t')} \min(t, t') \\ &= \lim_{T \rightarrow +\infty} \frac{1}{T} \frac{\ell^2(a+a^2)}{\Delta t} \left[ \int_0^T dt \int_0^t dt' e^{2i\pi f(t-t')} t' + \int_0^T dt' \int_0^{t'} dt e^{2i\pi f(t-t')} t \right] \\ &= \lim_{T \rightarrow +\infty} \frac{2}{T} \frac{\ell^2(a+a^2)}{\Delta t} \operatorname{Re} \left[ \int_0^T dt \int_0^t dt' e^{2i\pi f(t-t')} t' \right] \\ &= \lim_{T \rightarrow +\infty} \frac{2}{T} \frac{\ell^2(a+a^2)}{\Delta t} \left[ \frac{T}{(2\pi f)^2} - \frac{\sin(2\pi f T)}{(2\pi f)^3} \right] \\ &= \frac{2\ell^2(a+a^2)}{\Delta t (2\pi f)^2}. \end{aligned} \quad [14]$$

71 The power spectrum is inversely proportional to the square of the frequency. By symmetry, the same is true for the trajectory  
 72 projected along the y axis.

73 **Bayesian classifier.** The classifier aims to output the stimulus orientation,  $\lambda$ , by accumulating evidence from RGC spiking  
 74 over time. Initially, the prior distribution is flat, i.e.,  $P(\lambda, x, y) = \frac{1}{4N_x N_y}$  for each of the 4 possible stimulus orientations (top,  
 75 bottom, left or right), each of the  $N_x$  possible positions along the x axis and each of the  $N_y$  possible positions along the y axis.  
 76 Since the temporal kernel is non-vanishing over two time steps and the diffusion process is iid, the current position of the  
 77 stimulus depends only on the position at the previous time step, and spikes from the current time step only carry information  
 78 about stimulus position during the current and previous time step. The posterior distribution can therefore be updated from  
 79 the following:

$$P(\lambda, x, y | \{\sigma_{t'}\}_{t' \leq t}) = \frac{1}{P(\{\sigma_{t'}\}_{t' \leq t})} P(\lambda, x, y, \{\sigma_{t'}\}_{t' \leq t}) \quad [15]$$

$$= \frac{1}{P(\{\sigma_{t'}\}_{t' \leq t})} \int dx' dy' P(\lambda, x, x', y, y', \{\sigma_{t'}\}_{t' \leq t-1}, \sigma_t) \quad [16]$$

$$= \frac{1}{P(\{\sigma_{t'}\}_{t' \leq t})} \int dx' dy' P(\sigma_t | \lambda, x, x', y, y', \{\sigma_{t'}\}_{t' \leq t-1}) P(\lambda, x, x', y, y', \{\sigma_{t'}\}_{t' \leq t-1}) \quad [17]$$

$$= \frac{1}{P(\{\sigma_{t'}\}_{t' \leq t})} \int dx' dy' P(\sigma_t | \lambda, x, x', y, y') P(x, y | \lambda, x', y', \{\sigma_{t'}\}_{t' \leq t-1}) P(\lambda, x', y', \{\sigma_{t'}\}_{t' \leq t-1}) \quad [18]$$

$$= \frac{P(\{\sigma_{t'}\}_{t' \leq t-1})}{P(\{\sigma_{t'}\}_{t' \leq t})} \int dx' dy' P(\sigma_t | \lambda, x, x', y, y') P(x, y | x', y') P(\lambda, x', y' | \{\sigma_{t'}\}_{t' \leq t-1}), \quad [19]$$

80 hence Eq. 1 of the main text. The transition matrix ,  $P(x, y | x', y')$ , containing the probabilities of all possible  $x', y'$  given the  
81 currently considered  $x, y$ , is written as

$$P(x, y | x', y') = \frac{d^{\frac{|x-x'|}{l}} e^{-d}}{|x-x'|!} + \frac{d^{N_x + \frac{|x-x'|}{l}} e^{-d}}{(N_x + \frac{|x-x'|}{l})!} + \frac{d^{N_x - \frac{|x-x'|}{l}} e^{-d}}{(N_x - \frac{|x-x'|}{l})!} \quad [20]$$

$$+ \frac{d^{\frac{|y-y'|}{l}} e^{-d}}{|y-y'|!} + \frac{d^{N_y + \frac{|x-x'|}{l}} e^{-d}}{(N_y + \frac{|x-x'|}{l})!} + \frac{d^{N_y - \frac{|x-x'|}{l}} e^{-d}}{(N_y - \frac{|x-x'|}{l})!}$$

83 where  $d = 2D\Delta t$ . The first three terms of the sum account for displacements along the x axis, where the first term captures  
84 the contribution of direct jumps from  $x', y'$  to  $x, y$ , the second term of longer jumps around the grid through the left, and the  
85 third term of longer jumps around the grid through the right due to cyclic boundary conditions. Similarly, the last three terms  
86 describe contributions from displacements along the y axis, including directly, around the grid through the top and the bottom.

## 87 References

- 88 1. S Poonja, S Patel, L Henry, A Roorda, Dynamic visual stimulus presentation in an adaptive optics scanning laser  
89 ophthalmoscope (2005).
- 90 2. A Roorda, et al., Adaptive optics scanning laser ophthalmoscopy. *Opt. express* **10**, 405–412 (2002).
- 91 3. WM Harmening, WS Tuten, A Roorda, LC Sincich, Mapping the perceptual grain of the human retina. *J. Neurosci.* **34**,  
92 5667–5677 (2014).
- 93 4. MN Ağaoğlu, CK Sheehy, P Tiruveedhula, A Roorda, ST Chung, Suboptimal eye movements for seeing fine details. *J.*  
94 *vision* **18**, 8–8 (2018).
- 95 5. R Engbert, K Mergenthaler, P Sinn, A Pikovsky, An integrated model of fixational eye movements and microsaccades.  
96 *Proc. Natl. Acad. Sci.* **108**, E765–E770 (2011).
- 97 6. MP Norton, DG Karczub, *Fundamentals of Noise and Vibration Analysis for Engineers*. (Cambridge University Press,  
98 Cambridge), 2 edition, (2003).
- 99 7. D Krapf, et al., Power spectral density of a single Brownian trajectory: What one can and cannot learn from it. *New J.*  
100 *Phys.* **20**, 023029 (2018).

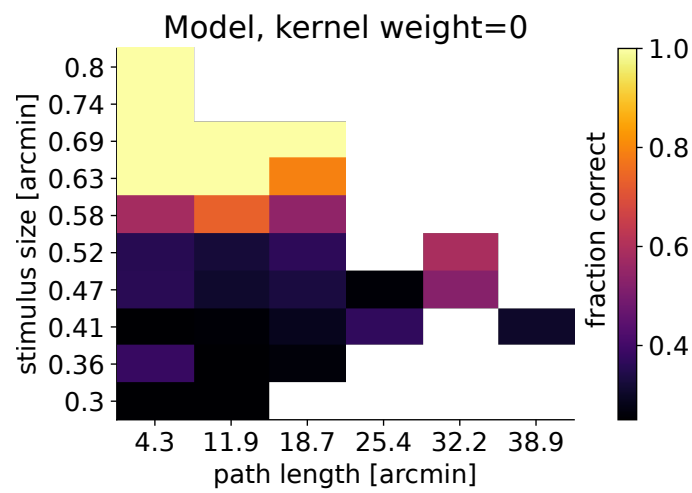

**Fig. S1.** Model fraction of correct trials as a function of stimulus size and path length for sustained cells. Although acuity is impaired for finer stimuli than receptive field size, longer FEM trajectories still leads to improved fractions of correct trials compared to shorter trajectories.
